# Supplementary material
Source: Springer Nature journal article supplement (https://www.springermedizin.de/resource/supplementary/12889_2009_2059_MOESM1_ESM.pdf/9484466)

# The Main Determinants of Health

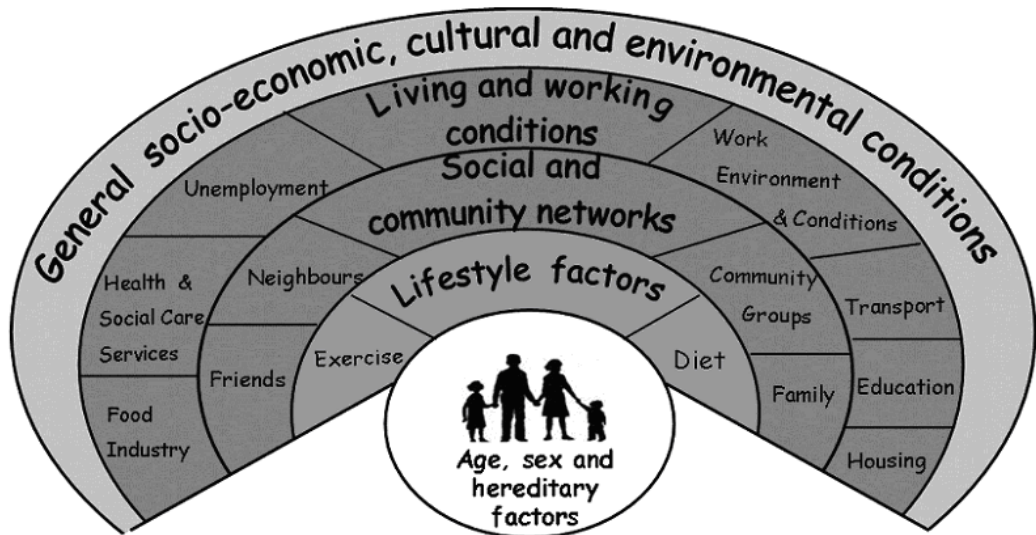

Adapted from: Dahlgren and Whitehead (with permission) [3]

Supplement: MOESM1 [file 9484466]
